# Supplementary material for: Effect of endotracheal tube plus stylet versus endotracheal tube alone on successful first-attempt tracheal intubation among critically ill patients: the multicentre randomised STYLETO study protocol
Source: PubMed Central journal article supplement — BMJ Open. 2020 Oct 7;10(10):e036718. doi: 10.1136/bmjopen-2019-036718 (PMC7542923; doi:10.1136/bmjopen-2019-036718), 2020-10-07

**Supplemental Figure S1**

Description of the endotracheal intubation procedure according the group of randomisation with (Experimental group) and without the Stylet in red color (Control group).

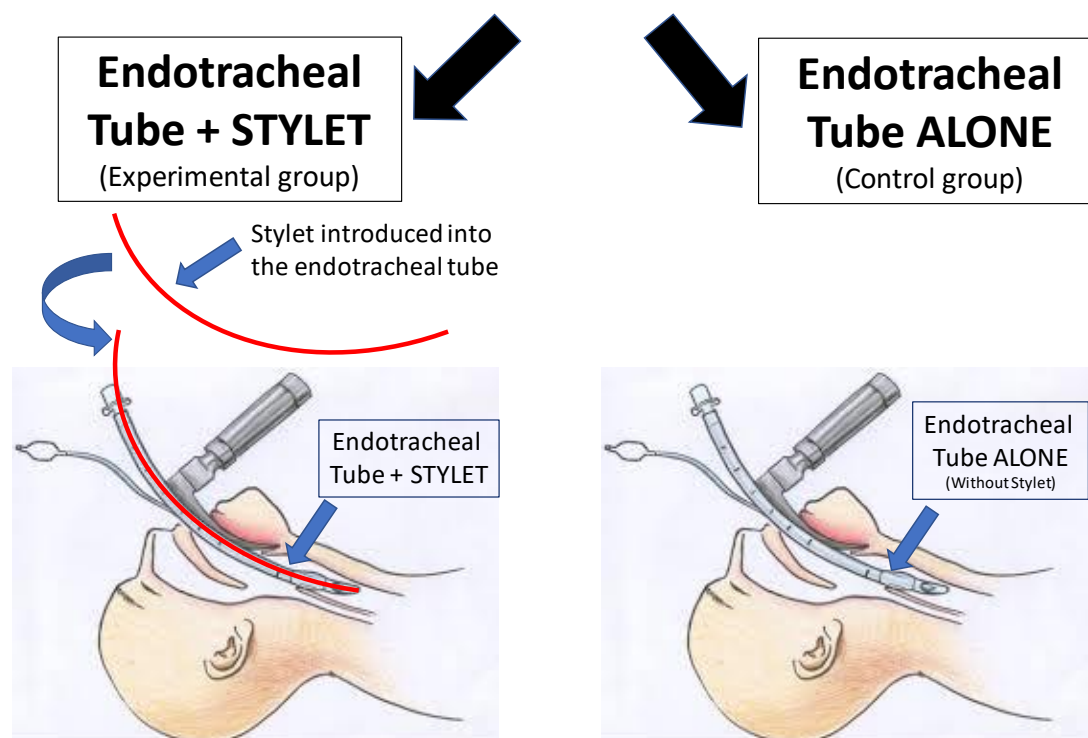

Supplement: bmjopen-2019-036718supp001.pdf [file bmjopen-2019-036718supp001.pdf]
